# Supplementary material for: Expression of a Grapevine NAC Transcription Factor Gene Is Induced in Response to Powdery Mildew Colonization in Salicylic Acid-Independent Manner
Source: PubMed Central journal article supplement (PMC4973223; doi:10.1038/srep30825), 2016-08-04
Supplement: srep30825-s2.pdf [file srep30825-s2.pdf]

# **Expression of a Grapevine NAC Transcription Factor Gene Is Induced in Response to Powdery Mildew Colonization in Salicylic Acid-Independent Manner**

Zsafia Toth, Patrick Winterhagen, Balazs Kalapos, Yingcai Su, Laszlo Kovacs,  
and Erzsebet Kiss

## Supplementary Data S2

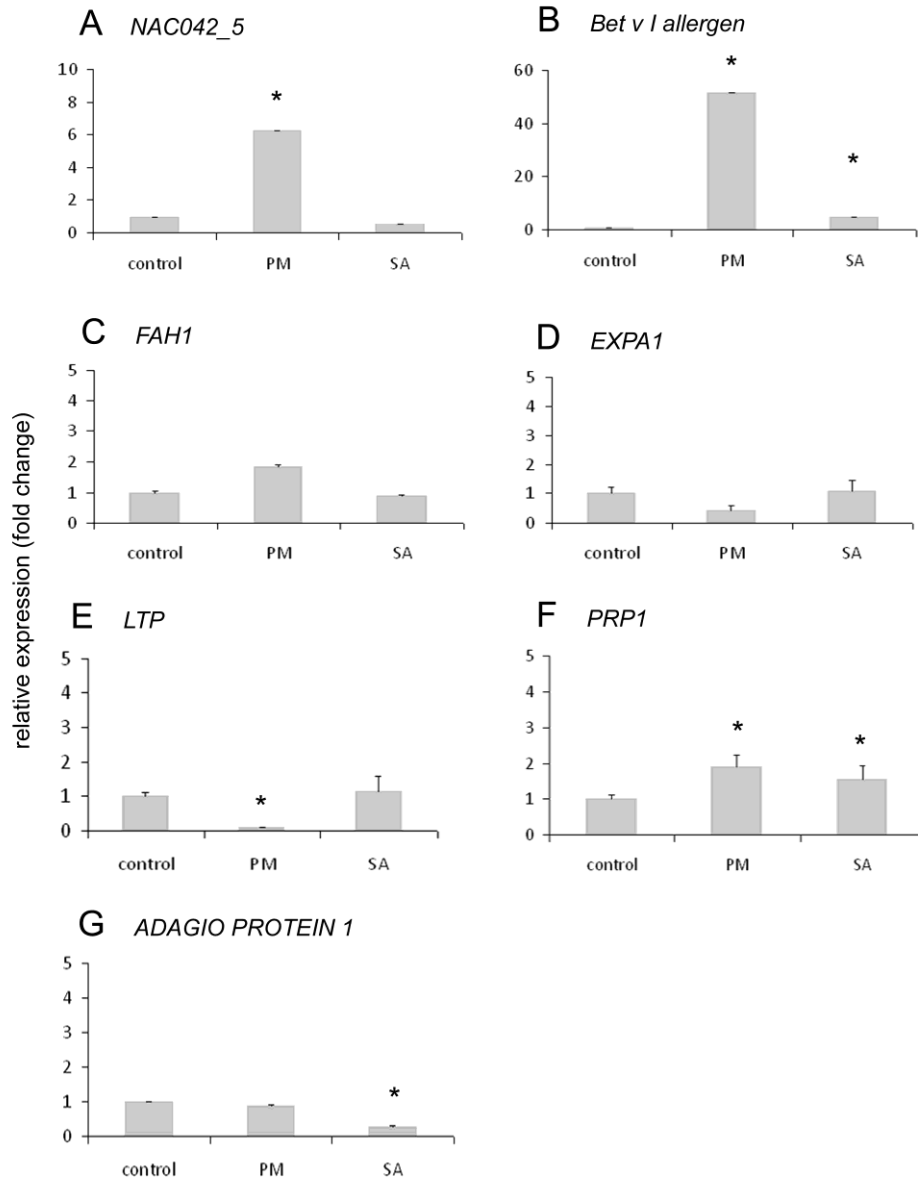

S2 Figure 1. Regulation of selected genes in PM-infected and MeSA-treated plants analyzed by qPCR. Expression is displayed as relative expression, asterisks indicate significant difference to the control (T-test;  $p = 0.05$ ), error bars indicate the standard deviation of three biological replicates. PM, powdery mildew responsive; SA, salicylic acid responsive.

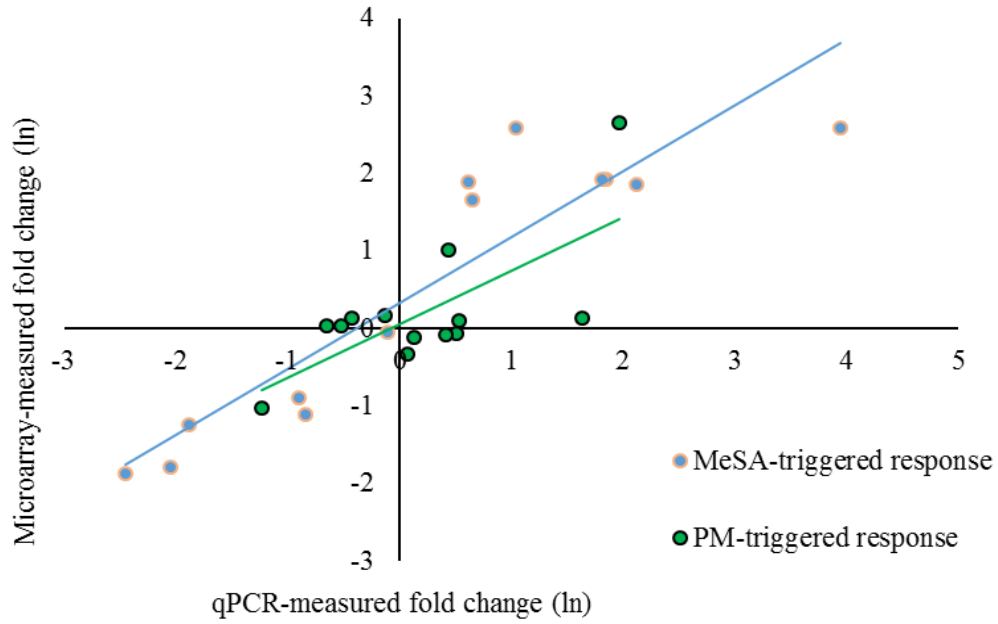

S2 Figure 2. Correlation between microarray and qPCR expression data (correlation coefficient  $r^2 = 0.762$ ). qPCR validation was performed in samples from experiments repeated independently from microarray study.

S2 Table 1. Primer sequences used in the qPCR experiment.

| <b>Grape gene ID</b>                                         | <b>Affymetrix Gene ID</b> | <b>Gene name</b> | <b>Primer F</b>           | <b>Primer R</b>             |
|--------------------------------------------------------------|---------------------------|------------------|---------------------------|-----------------------------|
| 18864001                                                     | 1613141_at                | NAC042_5         | TGGTTGTCGGCCAAATGAG       | CAGTCATAAACATGAGGTGG        |
| 33089001                                                     | 1618568_s_at              | Bet v I allergen | CATCTATCAGTCTCAATAAGTTTGG | AAGGTAATACAATAATGACACTTCATG |
| 19415001                                                     | 1620245_at                | FAH1             | TGTATCATTGCCAACTGAGTTC    | ATGACCTACCAAAGTAAGAG        |
| 20991001                                                     | 1619082_at                | EXPA1            | TGTCCATGCTGTTTCCATC       | GCTGGTGACTACTCTGAAG         |
| 32674001                                                     | 1606656_at                | LTP              | CTTATTAGTGCGTGTGGG        | CCGTTAACAACAGACAACAG        |
| 38581001                                                     | 1611058_at                | PRP1             | TGGCTACCTACGCCCAGAAC      | CGGTGCCTGTCAATGAAG          |
| TC89970                                                      | 1614760_at                | ADAGIO PROTEIN 1 | CTTCTGACGTGTTCCACTG       | CACAACCACATCCCACG           |
| TC60835<br>TC2116<br>TC9040<br>TC13894<br>TC25236<br>TC45156 |                           | ACTIN            | CCCCACCTCAACACATCTCC      | TCCATTGTCCACAGGAAGTGC       |
